# Supplementary material for: The Age of the 20 Meter Solo River Terrace, Java, Indonesia and the Survival of Homo erectus in Asia
Source: PLoS One. 2011 Jun 29;6(6):e21562. doi: 10.1371/journal.pone.0021562 (PMC3126814; doi:10.1371/journal.pone.0021562)
Supplement: Table S2 — Results for ESR and U-series analyses for Jigar samples. (XLS) [file pone.0021562.s002.xls]

## Sheet: Sheet1
Lab. No	Specimen	layer	cmbs	De	De-error	TT	U(SED)		Th(SED)		K(SED)		U(EN)		U(DE)		R48(DE1)		R04(DE1)		R08		U-series	error	EU(ka)	error	LU(ka)	error	US-ESR	+-error	-error
				Gy	Gy	µm	ppm	ppm	ppm	ppm	%	%	ppm	ppm	ppm	ppm							ka	ka	ka	ka	ka	ka	ka	ka	ka
2372A	57	II	79	74.5888	1.80502	1400	0.738	0.0216795	3.26	0.069282	0.80288	0.0172112	1.17791	0.0096625	123.128	0.0096625	1.09889	0.000290457	0.445114	0.000391528	0.489129	0.000430245	63.7	0.1	46	2	68	4	MV
2372B				87.609	3.09561	1250							1.17791	0.0096625	123.128	0.0096625	1.09889	0.000290457	0.445114	0.000391528	0.489129	0.000430245	63.7	0.1	50	3	75	5	MV
2375A	64	II	82	138.246	7.95631	1050	0.816	0.0577062	3.594	0.122597	0.88364	0.0445708	2.8543	0.0161087	127.928	0.039721	1.09508	0.000289546	0.809129	0.000710561	0.88606	0.00077812	173.8	0.4	57	4	90	7	Leach
2375B				135.507	5.06459	1050							2.8543	0.0161087	127.928	0.039721	1.09508	0.000289546	0.809129	0.000710561	0.88606	0.00077812	173.8	0.4	56	3	88	5	leach
2369A	63	II	86	102.544	3.56588	1000	0.774	0.0993982	3.198	0.338186	0.7852	0.0927476	0.402343	0.00237662	86.7959	0.0813015	1.10833	0.00058349	0.468938	0.00231166	0.519736	0.00256207	68.3	0.5	67	4	97	7	MV
2369B				111.878	4.83615	1000							0.402343	0.00237662	86.7959	0.0813015	1.10833	0.00058349	0.468938	0.00231166	0.519736	0.00256207	68.3	0.5	72	5	105	8	77	10	8
2377A	21	II	93	96.9974	3.0054	1600	0.71	0.06	3.01	0.12	0.7823	0.04	1.57651	0.0165048	99.9618	0.247546	1.09569	0.000304276	0.951404	0.00207852	1.04245	0.00227742	285.3	2.9	62	3	92	5	leach
2377B				92.429	3.01814	1800							1.57651	0.0165048	99.9618	0.247546	1.09569	0.000304276	0.951404	0.00207852	1.04245	0.00227742	285.4	2.9	61	3	91	5	leach
2373A	70	II	95	86.1932	2.45232	1000	0.638	0.136272	2.942	0.628785	0.75562	0.0378865	0.71	0.414049	56.1511	0.293562	1.09117	0.00271532	0.704775	0.00575032	0.769027	0.00627456	129.7	2.1	59	3	86	5	Leach
2373B				98.2579	2.58474	900							0.71	0.414049	56.1511	0.293562	1.09117	0.00271532	0.704775	0.00575032	0.769027	0.00627456	129.7	2.1	64	4	94	6	Leach
2376A	76	IV	138	80.5484	2.34744	1400	0.8725	0.0419325	3.465	0.0888819	0.848375	0.0117426	1.69221	0.0150496	73.793	0.0359515	1.07108	0.000336555	0.774085	0.000771761	0.82911	0.000826621	157.8	0.4	54	3	77	5	leach
2376B				83.1212	3.83141	1600							1.69221	0.0150496	73.793	0.0359515	1.07108	0.000336555	0.774085	0.000771761	0.82911	0.000826621	157.8	0.4	58	3	82	5	leach
2370A	77	IV	143	82.9244	2.28195	1100	0.816	0.0577062	3.594	0.122597	0.88364	0.0445708	2.00821	0.0790544	90.884	0.0956946	1.07958	0.000500856	0.468938	0.00231166	0.506257	0.00249563	68.5	0.5	47	2	70	4	MV
2370B				75.5207	4.23537	1200							2.00821	0.0790544	90.884	0.0956946	1.07958	0.000500856	0.468938	0.00231166	0.506257	0.00249563	68.5	0.5	44	2	66	4	MV
2368A	24	IV	168	172.243	6.06086	1000	0.95	0.182757	3.784	0.773259	0.75376	0.168508	1.09257	0.00325786	94.5897	0.140351	1.08718	0.000764233	0.532645	0.00490109	0.579082	0.00532838	82	1.1	92	6	139	10	105	14	12
2368B				207.101	8.5761	1000							1.09257	0.00325786	94.5897	0.140351	1.08718	0.000764233	0.532645	0.00490109	0.579082	0.00532838	82	1.1	107	8	163	13	143	20	17
MV=Model violations (closed system U-series between EU and LU ESR ages)								De = Dose
Leach: U-series age >> LU (ESR)								TT: total enamel thickness
								SED: sedfiment
Underlying assumptions:								DE: dentine
Water in dentine: 10+/-5 %								EN: enamel
Water in sediment: 20+/-10%								R48: U-234/U-238 activity ratio
Error in thickness: 100 µm								R04: Th-230/U-234 activity ratio
Removed layer from each side: 50+/-20 µm								EU: Early U-uptake (closed system)
Alpha efficiency: 0.13+/-0.02 (Grün and Katzenberger-Apel 1994)								LU: Linear U-uptake
U-series isotopic rations in enamel same as dentine								US-ESR: combined U-series/ESR age estimate (Grün et al. 1988)
Age calculations with ESR-DATA (Grün 2009)
